# Supplementary material for: Role of ERK/MAPK in endothelin receptor signaling in human aortic smooth muscle cells
Source: PubMed Central journal article supplement (PMC2715373; doi:10.1186/1471-2121-10-52), 2009-07-03

**A**

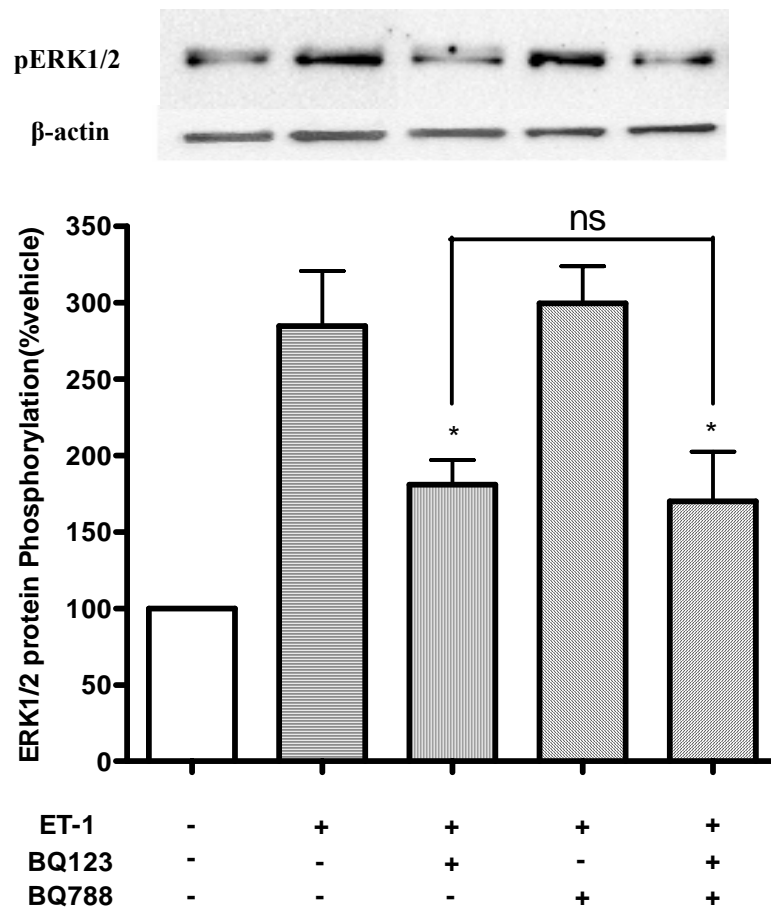

**B**

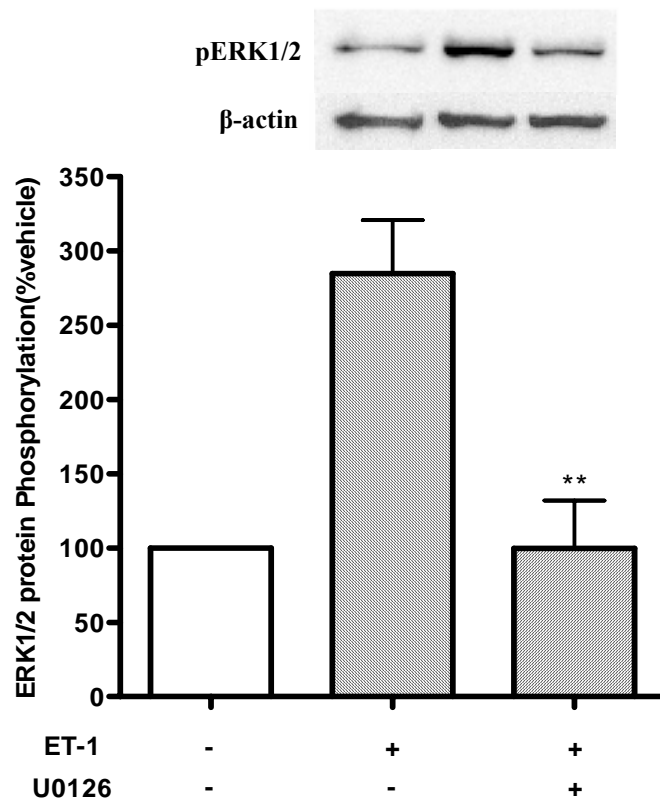

Supplement: 1471-2121-10-52-S1.pdf [file 1471-2121-10-52-S1.pdf]
