# Supplementary material for: Role of ERK/MAPK in endothelin receptor signaling in human aortic smooth muscle cells
Source: PubMed Central journal article supplement (PMC2715373; doi:10.1186/1471-2121-10-52), 2009-07-03

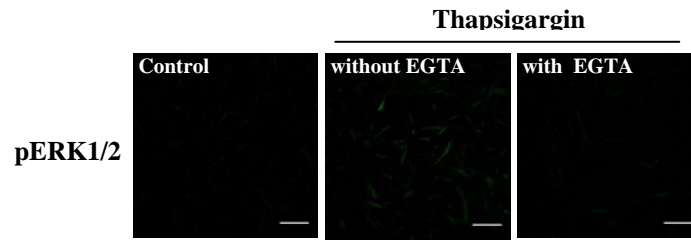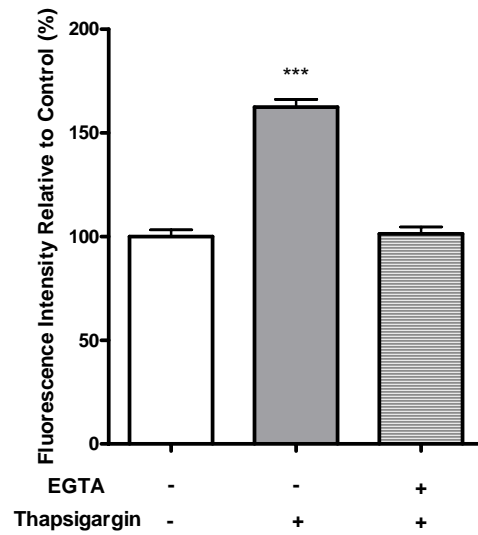

Supplement: 1471-2121-10-52-S3.pdf [file 1471-2121-10-52-S3.pdf]
